# Supplementary material
Source: PubMed Central journal article supplement (PMC8595843)
Supplement: NIHMS1741135-supplement-supinfo.pdf [file NIHMS1741135-supplement-supinfo.pdf]

# Supporting Information for “Partially linear single-index generalized mean residual life models”

Peng Jin<sup>1</sup> and Mengling Liu<sup>\*1,2</sup>

<sup>1</sup>Division of Biostatistics, Department of Population Health, New York University  
Grossman School of Medicine, New York, NY 10016, USA

<sup>2</sup>Department of Environmental Medicine, New York University Grossman School of  
Medicine, New York, NY 10016, USA

The Supporting Information contains additional simulation and data application results of Section 3.1 and 4 in the main manuscript, respectively. Regularity conditions and all technical proofs regarding Theorem 1 in Section 2.4 and the double robustness property in Section 2.5 are also available.

## Web Appendix A: Additional simulation results

Table A.1 and A.2 present the simulation results of estimated single-index coefficients that referenced in Section 3.1 when censoring rate was 10%. In the case of a linear single-index function (S1), the estimated single-index coefficients under both GMRL model and PLSI GMRL model performed well. The efficiency loss of  $\hat{\beta}$  from the PLSI GMRL model were small compared to the estimators from the GMRL model. When the true single-index function was a sine curve (S2), the estimators were low biased under both models, and the estimators from the PLSI GMRL were more efficient than the estimators from the GMRL model. In the case of a quadratic single-index function (S3), the estimators from the proposed PLSI GMRL model outperformed those from the GMRL model in terms of biases, coverage probabilities, and efficiency.

Additional simulation results under a 20% censoring rate were summarized in Table A.3 for both  $g(t) = \exp(t)$  and  $g(t) = t$ . Moreover, Table A.4 shows the simulation results under a 10% censoring rate with a baseline MRL function  $m_0(t) = g^{-1}\{(-\frac{1}{3}t + 1)I(-\frac{1}{3}t + 1 \geq 0)\}$ , mimicking an exponential distribution resulting from the right skewness for survival time when all covariates equal 0. We observed similar results as explained in Section 3.1.

## Web Appendix B: Additional data application results

Figure B.1 visualizes the correlation matrix of Pearson correlation coefficients of five log-transformed biomarkers in the COVID-19 application, and Figure B.2 shows the standardized score process for model diagnosis. Figure B.3 shows the predicted recovery time within 30 days since hospitalization based on different procalcitonin levels.

## Web Appendix C: Consistency and asymptotic normality of the estimators $\hat{\theta}$

### Regularity conditions

One could use two types of asymptotic properties, increasing number of knots and fixed number of knots. For the reason of practicality, we assume the number of knots being fixed throughout the proof. The nonparametric single-index function  $\psi(\cdot)$  is assumed to be a spline function with fixed knots. When the single-index function  $\psi(\cdot)$  is smooth, the bias of  $\hat{\psi}(\cdot)$  due to approximating  $\psi(\cdot)$  by a spline is usually negligible

compared with the variance of  $\hat{\psi}(\cdot)$ . To establish the asymptotic properties of the proposed estimators, we first outline the regularity conditions.

(C1)  $H(t)$  converges almost surely to a nonrandom and bounded function  $\tilde{H}(t)$  uniformly in  $t \in [0, \tau]$ .

(C2)  $V$  is bounded and  $G$  is continuous.

(C3)  $m_0(t)$  is continuously differentiable on  $[0, \tau]$ .

(C4)  $A := E \left[ \int_0^\tau I(T_i > t) [g'\{m_0(t) + \phi(V_i; \theta_*)\} \{\phi'(V_i; \theta_*) - \bar{v}(t)\} \{\phi'(V_i; \theta_*)\}^T - \frac{\partial \phi'(V_i; \theta_*)}{\partial \theta_*^T} [T_i - t - g\{m_0(t) + \phi(V_i; \theta_*)\}]] d\tilde{H}(t) \right]$  is nonsingular where  $\bar{v}(t)$  is the limit of  $\bar{V}(t; \theta_*)$ .

## Proof of Theorem 1(i)

We first want to establish the consistency of the estimators  $\hat{m}_0(t)$  and  $\hat{\theta}$ . Condition (C3) implies that  $m_0(t)$  is of bounded variation on  $[0, \tau]$ . Therefore the processes

$$n^{-1} \sum_{i=1}^n \frac{\delta_i I(T_i > t)}{G(T_i)} [T_i - t - g\{m_0(t) + s + \phi(V_i; \theta)\}]$$

can be written as sums of products of monotone functions in  $t, s$  and all components of  $\theta$ . Since monotone functions have pseudodimension 1, the processes are manageable (Bilias et al., 1997). It follows from the uniform strong law of large numbers (Lin et al., 2001) and the uniform consistency of  $\hat{G}$  to  $G$  (Fleming and Harrington, 1991) that for any  $\epsilon > 0$  and  $r > 0$ ,

$$\begin{aligned} n^{-1} \sum_{i=1}^n \frac{\delta_i I(T_i > t)}{\hat{G}(T_i)} [T_i - t - g\{m_0(t) + q + \phi(V_i; \theta)\}] \\ \rightarrow E[F(t|V_i)(g\{m_*(t) + \phi(V_i; \theta_*)\} - g\{m_0(t) + q + \phi(V_i; \theta)\})] \end{aligned}$$

almost surely and uniformly in  $q \in [0, r]$  and  $\theta \in \Theta = \{\theta : \|\theta - \theta_*\| \leq \epsilon\}$ , where  $F(t|V_i)$  denotes the survival function of  $T_i$  given  $V_i$ . Thus, except for a null set, for all large  $n$ ,  $t \in [0, \tau]$ ,  $\theta \in \Theta$ , and sufficiently large  $q$ ,

$$n^{-1} \sum_{i=1}^n \frac{\delta_i I(T_i > t)}{\hat{G}(T_i)} [T_i - t - g\{m_0(t) + q + \phi(V_i; \theta)\}] < 0, \quad (1)$$

$$n^{-1} \sum_{i=1}^n \frac{\delta_i I(T_i > t)}{\hat{G}(T_i)} [T_i - t - g\{m_0(t) - q + \phi(V_i; \theta)\}] > 0. \quad (2)$$

By (1) and (2) and the monotonicity and continuity of  $g(\cdot)$ , any  $t \in [0, \tau]$  and  $\theta \in \Theta$ , there exists a unique  $\hat{m}_0(t; \theta)$  that satisfies

$$n^{-1} \sum_{i=1}^n \frac{\delta_i I(T_i > t)}{\hat{G}(T_i)} [T_i - t - g\{\hat{m}_0(t; \theta) + \phi(V_i; \theta)\}] = 0. \quad (3)$$

To prove the existence and uniqueness of  $\hat{m}_0(t)$  and  $\hat{\theta}$ , it suffices to show the existence of a unique solution to  $U(\theta) = 0$ . Take derivative of (3) with respect to  $\theta$ , we have

$$\frac{\partial \hat{m}_0(t; \theta)}{\partial \theta} = - \frac{\sum_{i=1}^n \delta_i I(T_i > t) \hat{G}^{-1}(T_i) g'\{\hat{m}_0(t; \theta) + \phi(V_i; \theta)\} \phi'(V_i; \theta)}{\sum_{i=1}^n \delta_i I(T_i > t) \hat{G}^{-1}(T_i) g'\{\hat{m}_0(t; \theta) + \phi(V_i; \theta)\}} = -\bar{V}(t; \theta). \quad (4)$$

Let  $\hat{A}(\theta) = -n^{-1} \partial U(\theta) / \partial \theta^T$ . Based on (4), we have

$$\begin{aligned} \hat{A}(\theta) &= n^{-1} \sum_{i=1}^n \int_0^\tau \frac{\delta_i I(T_i > t)}{\hat{G}(T_i)} \left[ g'\{\hat{m}_0(t; \theta) + \phi(V_i; \theta)\} \{\phi'(V_i; \theta) - \bar{V}(t; \theta)\} \{\phi'(V_i; \theta)\}^T \right. \\ &\quad \left. - \frac{\partial \phi'(V_i; \theta)}{\partial \theta^T} [T_i - t - g\{\hat{m}_0(t; \theta) + \phi(V_i; \theta)\}] \right] dH(t), \end{aligned}$$

which is nonnegative definite. By the uniform strong law of large numbers, it is easy to show  $\hat{m}_0(t; \theta)$  converges almost surely to  $m_0(t; \theta)$  uniformly in  $t$  and  $\theta$ , and  $m_0(t; \theta_*) = m_0(t)$ . Similarity,  $\bar{v}(t; \theta) = \lim_{n \rightarrow \infty} \bar{V}(t; \theta)$  exists and the convergence is almost surely and uniformly in  $t$  and  $\theta$ . Thus,  $\hat{A}(\theta)$  converges almost surely to a nonrandom  $A(\theta)$  uniformly in  $\theta$ , and it is obvious that  $A(\theta_*) = A$ , where

$$A(\theta) = E \left[ \int_0^\tau F(t|V_i) \left[ g' \{ m_0(t; \theta) + \phi(V_i; \theta) \} \{ \phi'(V_i; \theta) - \bar{v}(t; \theta) \} \{ \phi'(V_i; \theta) \}^T \right. \right. \\ \left. \left. - [T - t - g \{ m_0(t; \theta) + \phi(V; \theta) \}] \frac{\partial \phi'(V_i; \theta)}{\partial \theta^T} \right] d\tilde{H}(t) \right].$$

We can check that  $n^{-1}U(\theta_*) \rightarrow 0$  almost surely and  $A$  is nonsingular by condition (C4). The uniform convergence of  $\hat{A}(\theta)$  and the continuity of  $A(\theta)$  imply that we can find a small neighborhood of  $\theta_*$  where  $\hat{A}(\theta)$  is positive definite when  $n$  is large enough. By the inverse function theorem (Rudin, 1976) that within a small neighborhood of  $\theta_*$ , there exists a unique solution  $\hat{\theta}$  to  $U(\theta) = 0$  for every sufficiently large  $n$ . Condition (C4) also implies the global uniqueness of  $\hat{\theta}$ . Therefore, unique estimators  $\hat{\theta}$  and  $\hat{m}_0(t)$  ( $0 \leq t \leq \tau$ ) exist. Note that above we showed  $\hat{\theta}$  is strongly consistent. It then follows from the uniform convergence of  $\hat{m}_0(t; \theta)$  to  $m_*(t; \theta)$  that  $\hat{m}_0(t) \doteq \hat{m}_0(t; \hat{\theta}) \rightarrow m_0(t; \theta_*) = m_0(t)$  almost surely uniformly in  $[0, \tau]$ .

### Proof of Theorem 1(ii)

By the first order Taylor expansion, for any  $t \in [0, \tau]$ ,

$$\begin{aligned} & \sum_{i=1}^n \frac{\delta_i I(T_i > t)}{\hat{G}(T_i)} [T_i - t - g \{ \hat{m}_0(t; \theta_*) + \phi(V_i; \theta_*) \}] \\ &= \sum_{i=1}^n \frac{\delta_i I(T_i > t)}{\hat{G}(T_i)} [T_i - t - g \{ m_0(t) + \phi(V_i; \theta_*) \}] \\ & \quad - [\hat{m}_0(t; \theta_*) - m_0(t)] \sum_{i=1}^n \frac{\delta_i I(T_i > t)}{\hat{G}(T_i)} g' \{ m^*(t) + \phi(V_i; \theta_*) \}, \end{aligned}$$

where  $m^*(t)$  lies between  $\hat{m}_0(t; \theta_*)$  and  $m_0(t)$ . Then,

$$\hat{m}_0(t; \theta_*) - m_0(t) = \frac{\sum_{i=1}^n \frac{\delta_i I(T_i > t)}{\hat{G}(T_i)} [T_i - t - g \{ m_0(t) + \phi(V_i; \theta_*) \}]}{\sum_{i=1}^n \frac{\delta_i I(T_i > t)}{\hat{G}(T_i)} g' \{ m^{**}(t) + \phi(V_i; \theta_*) \}}, \quad (5)$$

where  $m^{**}(t)$  also lies between  $\hat{m}_0(t; \theta_*)$  and  $m_0(t)$ . Also,

$$U(\theta_*) = \sum_{i=1}^n \int_0^\tau \frac{\delta_i I(T_i > t) \phi'(V_i; \theta_*)}{\hat{G}(T_i)} [T_i - t - g \{ m_0(t) + \phi(V_i; \theta_*) \} \\ - g' \{ m^*(t) + \phi(V_i; \theta_*) \} \{ \hat{m}_0(t; \theta_*) - m_0(t) \}] dH(t) \quad (6)$$

Combining (5) and (6), we get

$$\begin{aligned} U(\theta_*) &= \sum_{i=1}^n \int_0^\tau \frac{\delta_i I(T_i > t)}{\hat{G}(T_i)} [T_i - t - g \{ m_*(t) + \phi(V_i; \theta_*) \}] \{ \phi'(V_i; \theta_*) - \bar{V}^*(t) \} dH(t) \\ &= \sum_{i=1}^n \int_0^\tau M_i(t) \frac{G(T_i)}{\hat{G}(T_i)} \{ \phi'(V_i; \theta_*) - \bar{V}^*(t) \} dH(t) \end{aligned}$$

where  $\bar{V}^*(t) = \frac{\sum_{i=1}^n \frac{\delta_i I(T_i > t)}{\hat{G}(T_i)} g' \{ m^*(t) + \phi(V_i; \theta_*) \} \phi'(V_i; \theta_*)}{\sum_{i=1}^n \frac{\delta_i I(T_i > t)}{\hat{G}(T_i)} g' \{ m^{**}(t) + \phi(V_i; \theta_*) \}}$ . Let  $\bar{v}(t) := \bar{v}(t; \theta_*)$ . Using the uniform consistency of  $\hat{G}$  and  $\hat{m}_0(t; \theta_*)$ , and the uniform strong law of large numbers, we obtain that  $\bar{V}^*(t)$  converges almost surely to  $\bar{v}(t)$  uniformly in  $t \in [0, \tau]$ , and  $\bar{v}(t)$  is a bounded function. Since  $Pr\{C \geq \tau\} > 0$ , we have

$$\sup_{0 \leq i \leq n} \left| \frac{G(T_i)}{\hat{G}(T_i)} - 1 \right| = O_p(n^{-1/2}).$$

Note that  $\sum_{i=1}^n M_i(t) = O_p(n^{1/2})$  uniformly in  $t \in [0, \tau]$  by the functional central limit theorem (Lin et al., 2000), then it follows from (C1) that

$$\begin{aligned} & \left| \sum_{i=1}^n \int_0^\tau M_i(t) \{\bar{V}^*(t) - \bar{v}(t)\} dH(t) \right| \\ & \leq \int_0^\tau |\bar{V}^*(t) - \bar{v}(t)| \left| \sum_{i=1}^n M_i(t) \right| dH(t) = o_p(n^{1/2}), \end{aligned}$$

and

$$\left| \sum_{i=1}^n \int_0^\tau M_i(t) \{\bar{V}^*(t) - \bar{v}(t)\} \left( \frac{G(T_i)}{\hat{G}(T_i)} - 1 \right) dH(t) \right| = o_p(n^{1/2}).$$

Therefore, we have

$$\sum_{i=1}^n \int_0^\tau M_i(t) \frac{G(T_i)}{\hat{G}(T_i)} \{\bar{V}^*(t) - \bar{v}(t)\} dH(t) = o_p(n^{1/2}), \quad (7)$$

and similarly,

$$\left| \sum_{i=1}^n \int_0^\tau M_i(t) \frac{G(T_i)}{\hat{G}(T_i)} \{\phi'(V_i; \theta_*) - \bar{v}(t)\} d[H - \tilde{H}](t) \right| = o_p(n^{1/2}). \quad (8)$$

Thus, by (7) and (8), we have

$$\begin{aligned} U(\theta_*) &= \sum_{i=1}^n \int_0^\tau M_i(t) \{\phi'(V_i; \theta_*) - \bar{v}(t)\} d\tilde{H}(t) \\ &+ \sum_{i=1}^n \int_0^\tau M_i(t) \left( \frac{G(T_i)}{\hat{G}(T_i)} - 1 \right) \{\phi'(V_i; \theta_*) - \bar{v}(t)\} d\tilde{H}(t) + o_p(n^{1/2}). \end{aligned} \quad (9)$$

The second term on the right-hand side of (9) equals

$$\begin{aligned} & \sum_{i=1}^n \int_0^\tau M_i(t) \{\phi'(V_i; \theta_*) - \bar{v}(t)\} d\tilde{H}(t) \frac{G(T_i) - \hat{G}(T_i)}{G(T_i)} + o_p(n^{1/2}) \\ &= \sum_{i=1}^n \int_0^\tau \frac{Q^*(t)}{\hat{\pi}(t)} dM_i^c(t) + o_p(n^{1/2}), \end{aligned} \quad (10)$$

where

$$Q^*(t) = n^{-1} \sum_{i=1}^n I(T_i \geq t) \int_0^\tau M_i(u) \{\phi'(V_i; \theta_*) - \bar{v}(t)\} d\tilde{H}(u).$$

By some calculations, it follows that

$$n^{-1/2} U(\theta_*) = n^{-1/2} \sum_{i=1}^n \xi_i + o_p(1),$$

where

$$\xi_i = \int_0^\tau M_i(t) \{\phi'(V_i; \theta_*) - \bar{v}(t)\} d\tilde{H}(t) + \int_0^\tau \frac{Q(t)}{\pi(t)} dM_i^c(t).$$

Utilizing the multivariate central limit theorem,  $n^{-1/2} U(\theta_*)$  is asymptotically normal with mean zero and covariance matrix  $\Sigma_{\theta_*} = E\{\xi_i^{\otimes 2}\}$ . Thus, applying the Taylor expansion of  $U(\hat{\theta})$  at  $\theta_*$ , we have

$$n^{1/2}(\hat{\theta} - \theta_*) = A^{-1} n^{-1/2} U(\theta_*) + o_p(1) = A^{-1} n^{-1/2} \sum_{i=1}^n \xi_i + o_p(1).$$

It follows that  $n^{1/2}(\hat{\theta} - \theta_*)$  is asymptotically zero-mean normal with covariance matrix  $A^{-1} \Sigma_{\theta_*} (A^{-1})^T$ , which can be estimated by  $\hat{A}^{-1} \hat{\Sigma}_{\hat{\theta}} (\hat{A}^{-1})^T$  defined in Theorem 1. Thus, the proof is complete.

## Web Appendix D: Double robustness property in Section 2.5

Here we prove  $E[Y_{F,G}(\theta; T, \delta, V)|V] = 0$  when either  $F$  or  $G$  is correctly specified. For any survival functions  $F_1$  and  $G_1$ , we have

$$Y_{F_1, G_1}(\theta; T, \delta, V) = \frac{\delta D(\theta; T, V)}{G_1(T)} - \frac{(1 - \delta)Q_{F_1}(\theta; C, V)}{G_1(C)} = \int_0^T Q_{F_1}(\theta; c, V) \frac{dG_1(c)}{G_1(c)^2}. \quad (11)$$

Note that  $E[\frac{\delta D(\theta; T, V)}{G_1(T)}|V] = -\int_0^\tau D(\theta; u, V) \frac{G(u)}{G_1(u)} dF(u|V)$ . Also, we have

$$\begin{aligned} E\left[\frac{(1 - \delta)Q_{F_1}(\theta; C, V)}{G_1(C)}|V\right] &= E\left[\frac{F(C|V)}{G_1(C)}Q_{F_1}(\theta; C, V)|V\right] \\ &= E\left[\frac{F(C|V)}{F_1(C|V)} \int_C^\tau D(\theta; u, V) dF_1(u|V) G_1(C)^{-1}|V\right] \\ &= -\int_0^\tau D(\theta; u, V) \left[ \int_0^u \frac{F(c|V)}{F_1(c|V)} G_1(c)^{-1} dG(c) \right] dF_1(u|V). \end{aligned}$$

Finally, we observe that

$$\begin{aligned} E\left[\int_0^T Q_{F_1}(\theta; c, V) \frac{dG_1(c)}{G_1(c)^2}|V\right] &= \int_0^\infty F(c|V) G(c) Q_{F_1}(\theta; c, V) \frac{dG_1(c)}{G_1(c)^2} \\ &= \int_0^\tau D(\theta; u, V) \left[ \int_0^u \frac{F(c|V)}{F_1(c|V)} \frac{G(c)}{G_1(c)^2} dG_1(c) \right] dF_1(u|V), \end{aligned}$$

and  $d[G(c)G_1(c)^{-1}] = G_1(c)^{-1}dG(c) - G(c)G_1(c)^{-2}dG_1(c)$ . Therefore, we have

$$\begin{aligned} E[Y_{F_1, G_1}(\theta; T, \delta, V)|V] &= -\int_0^\tau D(\theta; u, V) \frac{G(u)}{G_1(u)} dF(u|V) \\ &\quad + \int_0^\tau D(\theta; u, V) \left[ \int_0^\tau \frac{F(c|V)}{F_1(c|V)} d[G(c)G_1(c)^{-1}] dF_1(u|V) \right] \end{aligned} \quad (12)$$

When  $F_1 = F$ , then right side of (12) equals

$$\begin{aligned} &-\int_0^\tau D(\theta; u, V) \left[ \frac{G(u)}{G_1(u)} - \int_0^u d[G(c)G_1(c)^{-1}] \right] dF(u|V) \\ &= \int_0^\tau D(\theta; u, V) \left[ \frac{G(u)}{G_1(u)} - \frac{G(u)}{G_1(u)} + 1 \right] dF(u|V) \\ &= E[D(\theta; T, V)|V] = 0. \end{aligned}$$

When  $G_1 = G$ ,  $d[G(c)G_1(c)^{-1}] = 0$ , and right side of (12) is  $-\int_0^\tau D(\theta; u, V) dF(u|V) = E[D(\theta; T, V)|V] = 0$ , which completes the proof.

## References

- Bilias, Y., Gu, M., and Ying, Z. (1997). Towards a general asymptotic theory for Cox model with staggered entry. *The Annals of Statistics*, 25(2), 662-682.
- Lin, D. Y., Wei, L. J., Yang, I. and Ying, Z. (2000). Semiparametric regression for the mean and rate functions of recurrent events. *Journal of the Royal Statistical Society: Series B (Statistical Methodology)* 62(4), 711-730.
- Lin, D. Y., Wei, L. J. and Ying, Z. (2001, June). Semiparametric Transformation Models for Point Processes. *Journal of the American Statistical Association* 96(454), 620-628.
- Fleming, T. R. and Harrington, D. P. (1991). Counting Processes and Survival Analysis. *Wiley Series in Probability and Mathematical Statistics: Applied Probability and Statistics*, John Wiley and Sons Inc., New York.
- Rudin, W. (1976): *Principles of Mathematical Analysis*. McGraw-Hill, New York, third edition.

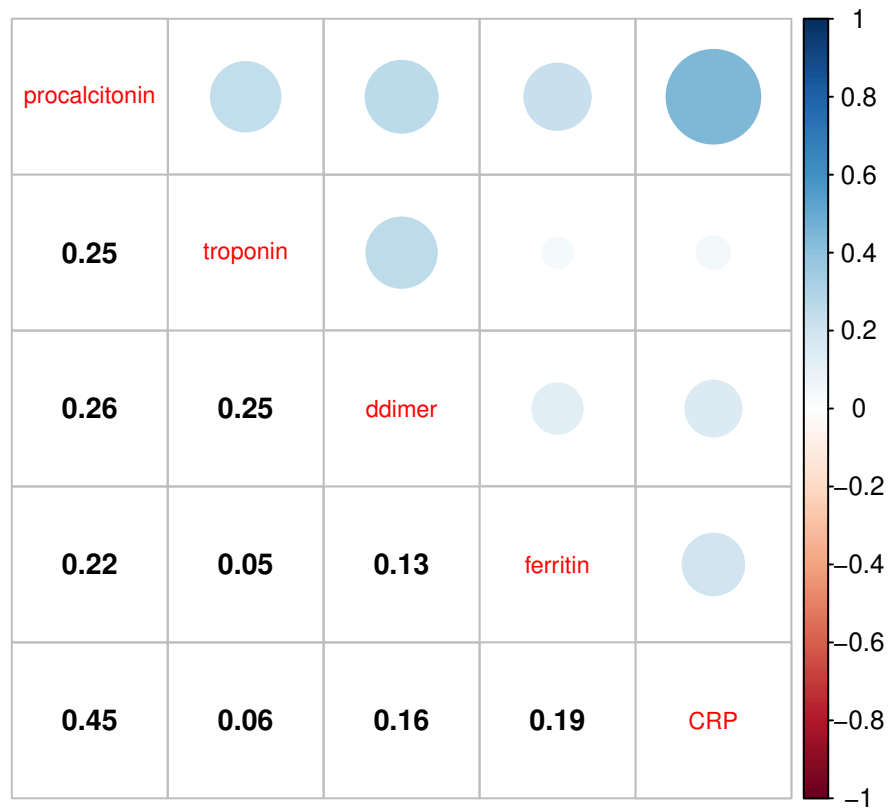

Figure B.1: Correlation matrix of Pearson correlation coefficients of five log-transformed biomarkers

Table A.1: Simulation results of estimated single-index coefficients under  $g(t) = \exp(t)$  with independent censoring

|                     | N    | GMRL   |       |       |      | PLSI GMRL |       |       |      |
|---------------------|------|--------|-------|-------|------|-----------|-------|-------|------|
|                     |      | Bias   | SD    | SE    | CP   | Bias      | SD    | SE    | CP   |
| S1. Linear case     |      |        |       |       |      |           |       |       |      |
| $\beta_1$           | 2000 | -0.005 | 0.066 | 0.064 | 92.8 | -0.006    | 0.070 | 0.074 | 95.0 |
| $\beta_2$           | 2000 | -0.003 | 0.065 | 0.063 | 94.2 | -0.003    | 0.070 | 0.074 | 95.6 |
| $\beta_3$           | 2000 | 0.005  | 0.067 | 0.063 | 94.0 | 0.006     | 0.075 | 0.074 | 95.0 |
| $\beta_4$           | 2000 | 0.004  | 0.065 | 0.064 | 94.0 | 0.005     | 0.069 | 0.073 | 97.2 |
| $\beta_1$           | 4000 | -0.001 | 0.044 | 0.045 | 95.4 | -0.001    | 0.045 | 0.049 | 96.4 |
| $\beta_2$           | 4000 | -0.005 | 0.045 | 0.046 | 93.6 | -0.005    | 0.047 | 0.049 | 96.6 |
| $\beta_3$           | 4000 | 0.000  | 0.044 | 0.045 | 95.0 | 0.001     | 0.045 | 0.049 | 95.4 |
| $\beta_4$           | 4000 | 0.001  | 0.044 | 0.045 | 95.8 | 0.002     | 0.046 | 0.048 | 96.8 |
| S2. Sine curve case |      |        |       |       |      |           |       |       |      |
| $\beta_1$           | 2000 | -0.002 | 0.036 | 0.034 | 92.6 | -0.002    | 0.031 | 0.031 | 93.6 |
| $\beta_2$           | 2000 | 0.000  | 0.035 | 0.034 | 94.4 | 0.000     | 0.030 | 0.031 | 96.4 |
| $\beta_3$           | 2000 | 0.002  | 0.034 | 0.034 | 95.8 | 0.001     | 0.030 | 0.031 | 96.2 |
| $\beta_4$           | 2000 | 0.002  | 0.033 | 0.034 | 97.0 | 0.001     | 0.030 | 0.031 | 96.2 |
| $\beta_1$           | 4000 | -0.001 | 0.025 | 0.024 | 94.2 | 0.000     | 0.022 | 0.022 | 94.0 |
| $\beta_2$           | 4000 | -0.002 | 0.025 | 0.024 | 93.6 | -0.001    | 0.022 | 0.022 | 95.4 |
| $\beta_3$           | 4000 | -0.001 | 0.024 | 0.024 | 94.6 | 0.000     | 0.022 | 0.022 | 95.4 |
| $\beta_4$           | 4000 | 0.002  | 0.025 | 0.024 | 94.4 | 0.001     | 0.022 | 0.022 | 94.2 |
| S3. Quadratic case  |      |        |       |       |      |           |       |       |      |
| $\beta_1$           | 2000 | -0.095 | 0.256 | 0.244 | 90.2 | -0.013    | 0.104 | 0.123 | 97.0 |
| $\beta_2$           | 2000 | -0.507 | 0.496 | 0.447 | 70.6 | -0.003    | 0.104 | 0.135 | 99.2 |
| $\beta_3$           | 2000 | 0.473  | 0.511 | 0.456 | 75.4 | 0.016     | 0.112 | 0.131 | 97.6 |
| $\beta_4$           | 2000 | 0.497  | 0.515 | 0.456 | 71.6 | 0.015     | 0.113 | 0.131 | 97.8 |
| $\beta_1$           | 4000 | -0.079 | 0.262 | 0.246 | 90.6 | -0.010    | 0.075 | 0.080 | 94.8 |
| $\beta_2$           | 4000 | -0.454 | 0.503 | 0.450 | 74.8 | -0.006    | 0.078 | 0.081 | 96.0 |
| $\beta_3$           | 4000 | 0.475  | 0.503 | 0.451 | 73.4 | 0.002     | 0.078 | 0.080 | 96.6 |
| $\beta_4$           | 4000 | 0.450  | 0.495 | 0.447 | 73.8 | 0.007     | 0.074 | 0.080 | 94.8 |

*GMRL*: generalized mean residual life model; *PLSI GMRL*: partially linear single-index generalized mean residual life model; *SD*: sample standard deviation; *SE*: mean of estimated standard error; *CP*: empirical coverage probability of 95% confidence interval; Censoring rate was 10%.

Table A.2: Simulation results of estimated single-index coefficients under  $g(t) = t$  with independent censoring

|                     |      | N      | GMRL  |       |      |        | PLSI GMRL |       |      |    |
|---------------------|------|--------|-------|-------|------|--------|-----------|-------|------|----|
|                     |      |        | Bias  | SD    | SE   | CP     | Bias      | SD    | SE   | CP |
| S1. Linear case     |      |        |       |       |      |        |           |       |      |    |
| $\beta_1$           | 2000 | -0.004 | 0.095 | 0.085 | 90.5 | -0.011 | 0.104     | 0.114 | 96.2 |    |
| $\beta_2$           | 2000 | -0.006 | 0.092 | 0.087 | 92.5 | -0.011 | 0.102     | 0.134 | 98.0 |    |
| $\beta_3$           | 2000 | -0.013 | 0.089 | 0.087 | 95.3 | -0.011 | 0.102     | 0.133 | 98.0 |    |
| $\beta_4$           | 2000 | 0.012  | 0.092 | 0.087 | 94.1 | -0.014 | 0.102     | 0.139 | 96.8 |    |
| $\beta_1$           | 4000 | -0.002 | 0.066 | 0.061 | 94.0 | -0.004 | 0.069     | 0.072 | 95.6 |    |
| $\beta_2$           | 4000 | -0.002 | 0.062 | 0.062 | 94.6 | -0.004 | 0.065     | 0.075 | 95.8 |    |
| $\beta_3$           | 4000 | -0.004 | 0.069 | 0.062 | 92.2 | -0.007 | 0.073     | 0.074 | 95.4 |    |
| $\beta_4$           | 4000 | 0.008  | 0.062 | 0.062 | 95.6 | 0.004  | 0.065     | 0.077 | 97.4 |    |
| S2. Sine curve case |      |        |       |       |      |        |           |       |      |    |
| $\beta_1$           | 2000 | -0.006 | 0.063 | 0.059 | 94.4 | -0.014 | 0.064     | 0.073 | 96.2 |    |
| $\beta_2$           | 2000 | -0.005 | 0.062 | 0.060 | 93.2 | -0.011 | 0.061     | 0.075 | 96.2 |    |
| $\beta_3$           | 2000 | 0.000  | 0.060 | 0.059 | 95.2 | -0.007 | 0.059     | 0.073 | 96.6 |    |
| $\beta_4$           | 2000 | 0.005  | 0.065 | 0.059 | 93.2 | -0.003 | 0.062     | 0.073 | 97.4 |    |
| $\beta_1$           | 4000 | -0.003 | 0.043 | 0.044 | 94.4 | -0.006 | 0.043     | 0.045 | 95.8 |    |
| $\beta_2$           | 4000 | 0.001  | 0.043 | 0.044 | 95.0 | -0.002 | 0.042     | 0.047 | 96.6 |    |
| $\beta_3$           | 4000 | 0.001  | 0.043 | 0.044 | 96.4 | -0.001 | 0.042     | 0.047 | 96.8 |    |
| $\beta_4$           | 4000 | 0.003  | 0.043 | 0.044 | 94.4 | 0.000  | 0.042     | 0.046 | 95.8 |    |
| S3. Quadratic case  |      |        |       |       |      |        |           |       |      |    |
| $\beta_1$           | 2000 | -0.092 | 0.258 | 0.239 | 90.8 | -0.005 | 0.093     | 0.099 | 96.2 |    |
| $\beta_2$           | 2000 | -0.410 | 0.496 | 0.442 | 77.4 | -0.002 | 0.096     | 0.105 | 97.6 |    |
| $\beta_3$           | 2000 | 0.414  | 0.499 | 0.441 | 77.0 | 0.009  | 0.087     | 0.105 | 97.4 |    |
| $\beta_4$           | 2000 | 0.401  | 0.499 | 0.443 | 80.0 | 0.016  | 0.088     | 0.102 | 98.0 |    |
| $\beta_1$           | 4000 | -0.050 | 0.276 | 0.229 | 89.4 | -0.003 | 0.059     | 0.065 | 96.6 |    |
| $\beta_2$           | 4000 | -0.402 | 0.477 | 0.437 | 79.6 | -0.008 | 0.060     | 0.065 | 95.6 |    |
| $\beta_3$           | 4000 | 0.428  | 0.487 | 0.434 | 76.6 | 0.001  | 0.059     | 0.065 | 96.6 |    |
| $\beta_4$           | 4000 | 0.407  | 0.484 | 0.437 | 79.2 | 0.002  | 0.061     | 0.064 | 96.8 |    |

*GMRL*: generalized mean residual life model; *PLSI GMRL*: partially linear single-index generalized mean residual life model; *SD*: sample standard deviation; *SE*: mean of estimated standard error; *CP*: empirical coverage probability of 95% confidence interval; Censoring rate was 10%.



Table A.3: Simulation results with independent censoring (20% censoring rate)

|                     | N    | $\alpha_1$ |       |       |      | $\alpha_2$ |       |       |      | $\omega(\beta_*, \hat{\beta})$ |       |
|---------------------|------|------------|-------|-------|------|------------|-------|-------|------|--------------------------------|-------|
|                     |      | Bias       | SD    | SE    | CP   | Bias       | SD    | SE    | CP   | Mean                           | SD    |
| $g(t) = \exp(t)$    |      |            |       |       |      |            |       |       |      |                                |       |
| S1. Linear case     |      |            |       |       |      |            |       |       |      |                                |       |
| GMRL                | 2000 | -0.004     | 0.099 | 0.097 | 94.2 | 0.001      | 0.095 | 0.097 | 94.2 | 7.54                           | 3.14  |
| PLSI GMRL           | 2000 | -0.004     | 0.099 | 0.097 | 93.8 | 0.000      | 0.095 | 0.097 | 94.4 | 8.04                           | 3.56  |
| GMRL                | 4000 | 0.000      | 0.069 | 0.068 | 93.2 | 0.003      | 0.066 | 0.068 | 94.4 | 5.33                           | 2.20  |
| PLSI GMRL           | 4000 | 0.000      | 0.069 | 0.068 | 92.8 | 0.003      | 0.066 | 0.068 | 94.6 | 5.54                           | 2.29  |
| S2. Sine curve case |      |            |       |       |      |            |       |       |      |                                |       |
| GMRL                | 2000 | 0.004      | 0.088 | 0.088 | 93.8 | 0.001      | 0.087 | 0.088 | 94.4 | 4.09                           | 1.76  |
| PLSI GMRL           | 2000 | 0.005      | 0.086 | 0.086 | 94.0 | 0.001      | 0.086 | 0.086 | 94.6 | 3.64                           | 1.55  |
| GMRL                | 4000 | 0.003      | 0.061 | 0.062 | 96.0 | -0.002     | 0.063 | 0.062 | 94.6 | 2.88                           | 1.22  |
| PLSI GMRL           | 4000 | 0.003      | 0.060 | 0.061 | 95.2 | -0.002     | 0.063 | 0.061 | 94.0 | 2.56                           | 1.07  |
| S3. Quadratic case  |      |            |       |       |      |            |       |       |      |                                |       |
| GMRL                | 2000 | -0.001     | 0.098 | 0.096 | 94.0 | -0.001     | 0.098 | 0.095 | 93.8 | 72.38                          | 31.97 |
| PLSI GMRL           | 2000 | 0.000      | 0.097 | 0.095 | 94.4 | 0.000      | 0.095 | 0.095 | 95.0 | 12.90                          | 6.55  |
| GMRL                | 4000 | -0.004     | 0.071 | 0.067 | 92.2 | 0.004      | 0.065 | 0.067 | 94.4 | 75.42                          | 30.80 |
| PLSI GMRL           | 4000 | -0.004     | 0.070 | 0.066 | 92.6 | 0.003      | 0.064 | 0.067 | 95.0 | 8.54                           | 3.87  |
| $g(t) = t$          |      |            |       |       |      |            |       |       |      |                                |       |
| S1. Linear case     |      |            |       |       |      |            |       |       |      |                                |       |
| GMRL                | 2000 | -0.006     | 0.131 | 0.119 | 91.1 | -0.002     | 0.129 | 0.119 | 93.1 | 11.21                          | 5.21  |
| PLSI GMRL           | 2000 | -0.006     | 0.130 | 0.119 | 91.9 | -0.003     | 0.129 | 0.118 | 93.3 | 14.33                          | 8.73  |
| GMRL                | 4000 | -0.003     | 0.090 | 0.088 | 93.2 | 0.001      | 0.090 | 0.088 | 93.6 | 8.22                           | 3.67  |
| PLSI GMRL           | 4000 | -0.003     | 0.090 | 0.087 | 93.2 | -0.001     | 0.090 | 0.088 | 94.0 | 9.24                           | 4.79  |
| S2. Sine curve case |      |            |       |       |      |            |       |       |      |                                |       |
| GMRL                | 2000 | -0.018     | 0.282 | 0.292 | 91.3 | -0.015     | 0.287 | 0.295 | 92.7 | 8.41                           | 3.49  |
| PLSI GMRL           | 2000 | -0.016     | 0.280 | 0.288 | 90.9 | -0.015     | 0.282 | 0.291 | 92.5 | 8.74                           | 4.96  |
| GMRL                | 4000 | 0.008      | 0.211 | 0.218 | 92.2 | 0.017      | 0.211 | 0.217 | 93.8 | 5.89                           | 2.58  |
| PLSI GMRL           | 4000 | 0.008      | 0.208 | 0.216 | 92.4 | 0.017      | 0.209 | 0.215 | 93.6 | 5.60                           | 3.06  |
| S3. Quadratic case  |      |            |       |       |      |            |       |       |      |                                |       |
| GMRL                | 2000 | -0.006     | 0.059 | 0.058 | 94.4 | -0.006     | 0.063 | 0.058 | 92.2 | 63.87                          | 34.22 |
| PLSI GMRL           | 2000 | -0.003     | 0.057 | 0.056 | 94.8 | -0.005     | 0.058 | 0.055 | 93.8 | 11.91                          | 6.33  |
| GMRL                | 4000 | -0.004     | 0.043 | 0.042 | 93.2 | 0.001      | 0.046 | 0.042 | 92.2 | 65.05                          | 34.35 |
| PLSI GMRL           | 4000 | -0.001     | 0.041 | 0.040 | 94.2 | 0.004      | 0.043 | 0.039 | 92.6 | 7.30                           | 3.64  |

*GMRL*: generalized mean residual life model; *PLSI GMRL*: partially linear single-index generalized mean residual life model; *SD*: sample standard deviation; *SE*: mean of estimated standard error; *CP*: empirical coverage probability of 95% confidence interval;  $\omega(\beta_*, \hat{\beta})$  was calculated by  $\arccos(\langle \beta_*, \hat{\beta} \rangle / \|\hat{\beta}\| \cdot \|\beta_*\|)$ .

Table A.4: Simulation results under independent censoring with a baseline MRL function  $m_0(t) = g^{-1}\{(-\frac{1}{3}t+1)I(-\frac{1}{3}t+1 \geq 0)\}$

|                     |      | N      | $\alpha_1$ |       |      |        | $\alpha_2$ |       |      |       | $\omega(\beta_*, \hat{\beta})$ |    |
|---------------------|------|--------|------------|-------|------|--------|------------|-------|------|-------|--------------------------------|----|
|                     |      |        | Bias       | SD    | SE   | CP     | Bias       | SD    | SE   | CP    | Mean                           | SD |
| $g(t) = \exp(t)$    |      |        |            |       |      |        |            |       |      |       |                                |    |
| S1. Linear case     |      |        |            |       |      |        |            |       |      |       |                                |    |
| GMRL                | 2000 | 0.004  | 0.121      | 0.123 | 95.2 | -0.001 | 0.125      | 0.122 | 94.8 | 9.33  | 4.02                           |    |
| PLSI GMRL           | 2000 | 0.004  | 0.121      | 0.123 | 95.4 | -0.002 | 0.126      | 0.123 | 94.8 | 10.45 | 4.82                           |    |
| GMRL                | 4000 | 0.002  | 0.087      | 0.087 | 94.4 | 0.007  | 0.089      | 0.087 | 94.6 | 6.61  | 2.74                           |    |
| PLSI GMRL           | 4000 | 0.002  | 0.087      | 0.087 | 94.6 | 0.007  | 0.089      | 0.087 | 94.6 | 6.98  | 3.15                           |    |
| S2. Sine curve case |      |        |            |       |      |        |            |       |      |       |                                |    |
| GMRL                | 2000 | -0.004 | 0.120      | 0.119 | 94.8 | 0.004  | 0.119      | 0.120 | 95.2 | 5.27  | 2.34                           |    |
| PLSI GMRL           | 2000 | -0.002 | 0.120      | 0.118 | 94.4 | 0.004  | 0.116      | 0.118 | 94.8 | 4.60  | 2.02                           |    |
| GMRL                | 4000 | 0.001  | 0.088      | 0.084 | 93.0 | 0.002  | 0.085      | 0.085 | 94.2 | 3.87  | 1.58                           |    |
| PLSI GMRL           | 4000 | 0.001  | 0.087      | 0.083 | 92.2 | 0.003  | 0.085      | 0.083 | 93.8 | 3.34  | 1.36                           |    |
| S3. Quadratic case  |      |        |            |       |      |        |            |       |      |       |                                |    |
| GMRL                | 2000 | 0.001  | 0.122      | 0.121 | 94.9 | -0.009 | 0.119      | 0.120 | 95.8 | 77.29 | 31.43                          |    |
| PLSI GMRL           | 2000 | 0.002  | 0.121      | 0.121 | 95.8 | -0.010 | 0.119      | 0.120 | 95.2 | 17.91 | 8.63                           |    |
| GMRL                | 4000 | -0.004 | 0.088      | 0.085 | 93.6 | -0.001 | 0.082      | 0.086 | 95.8 | 72.43 | 32.06                          |    |
| PLSI GMRL           | 4000 | -0.002 | 0.088      | 0.085 | 93.6 | -0.002 | 0.081      | 0.085 | 96.6 | 12.29 | 6.03                           |    |
| $g(t) = t$          |      |        |            |       |      |        |            |       |      |       |                                |    |
| S1. Linear case     |      |        |            |       |      |        |            |       |      |       |                                |    |
| GMRL                | 2000 | -0.017 | 0.150      | 0.155 | 96.3 | 0.001  | 0.160      | 0.156 | 94.4 | 13.71 | 8.49                           |    |
| PLSI GMRL           | 2000 | -0.017 | 0.151      | 0.156 | 95.7 | 0.001  | 0.160      | 0.156 | 94.0 | 17.87 | 8.82                           |    |
| GMRL                | 4000 | 0.001  | 0.117      | 0.110 | 91.8 | 0.001  | 0.109      | 0.109 | 94.4 | 9.93  | 4.08                           |    |
| PLSI GMRL           | 4000 | 0.001  | 0.117      | 0.110 | 91.8 | 0.001  | 0.110      | 0.110 | 94.6 | 11.78 | 5.85                           |    |
| S2. Sine curve case |      |        |            |       |      |        |            |       |      |       |                                |    |
| GMRL                | 2000 | -0.023 | 0.298      | 0.298 | 95.6 | -0.026 | 0.321      | 0.301 | 94.8 | 8.11  | 3.59                           |    |
| PLSI GMRL           | 2000 | -0.022 | 0.299      | 0.297 | 94.4 | -0.024 | 0.324      | 0.302 | 94.0 | 7.60  | 3.61                           |    |
| GMRL                | 4000 | -0.004 | 0.216      | 0.214 | 94.2 | -0.001 | 0.214      | 0.215 | 95.2 | 5.92  | 2.44                           |    |
| PLSI GMRL           | 4000 | -0.003 | 0.217      | 0.214 | 93.8 | 0.001  | 0.212      | 0.215 | 95.4 | 5.56  | 2.47                           |    |
| S3. Quadratic case  |      |        |            |       |      |        |            |       |      |       |                                |    |
| GMRL                | 2000 | -0.015 | 0.144      | 0.139 | 95.1 | -0.014 | 0.131      | 0.139 | 96.0 | 71.50 | 32.39                          |    |
| PLSI GMRL           | 2000 | -0.014 | 0.144      | 0.138 | 95.3 | -0.014 | 0.130      | 0.138 | 96.3 | 20.21 | 10.41                          |    |
| GMRL                | 4000 | -0.002 | 0.094      | 0.098 | 96.1 | 0.004  | 0.100      | 0.098 | 95.0 | 69.72 | 31.46                          |    |
| PLSI GMRL           | 4000 | 0.002  | 0.094      | 0.097 | 95.9 | 0.005  | 0.099      | 0.097 | 94.8 | 12.61 | 6.39                           |    |

*GMRL*: generalized mean residual life model; *PLSI GMRL*: partially linear single-index generalized mean residual life model; *SD*: sample standard deviation; *SE*: mean of estimated standard error; *CP*: empirical coverage probability of 95% confidence interval;  $\omega(\beta_*, \hat{\beta})$  was calculated by  $\arccos(\langle \beta_*, \hat{\beta} \rangle / \|\hat{\beta}\| \cdot \|\beta_*\|)$ ; Censoring rate was 10%.

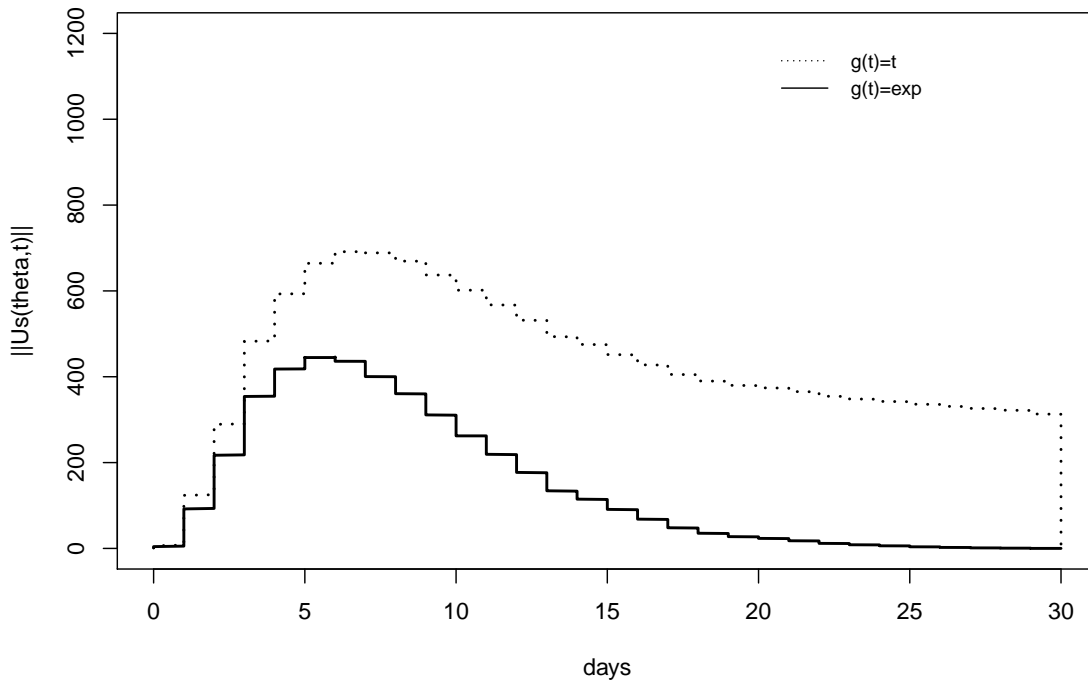

Figure B.2: Standardized score process for model diagnosis

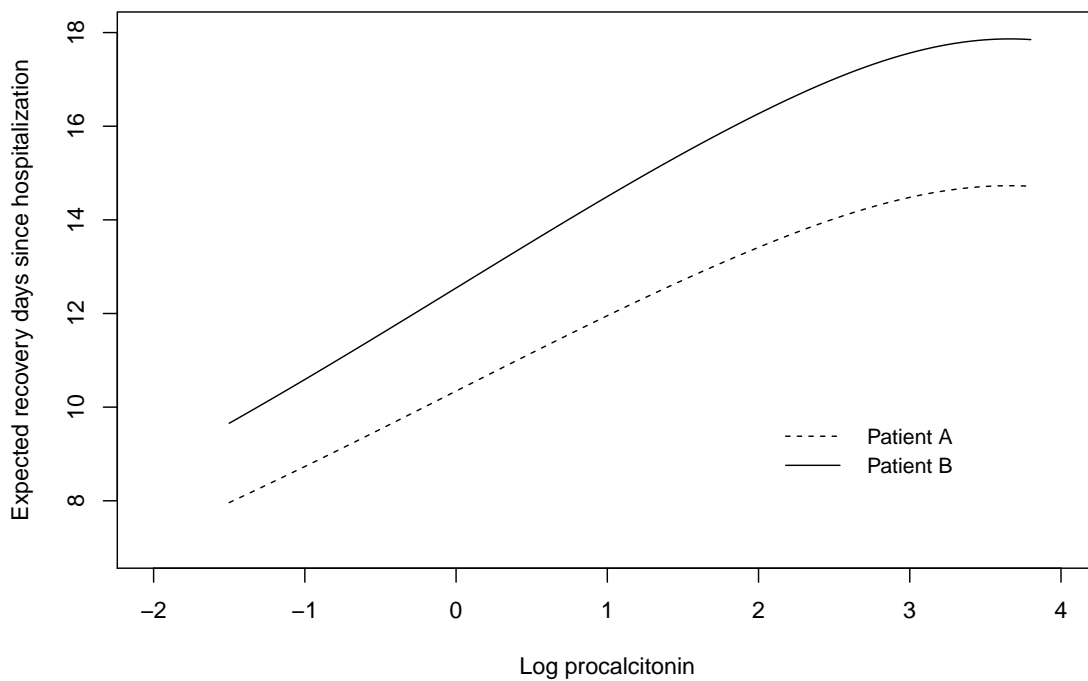

Figure B.3: Predicted recovery time within 30 days since hospitalization based on different procalcitonin levels. Patient A: a 35-year-old COVID-19 confirmed Caucasian female having 25 kg/m<sup>2</sup> BMI, 90% SpO<sub>2</sub>, and 38.5 Celsius temperature with all log-transformed biomarkers at median values except for procalcitonin. Patient B: same profile as patient A but with a history of cardiac disease, diabetes, and malignancy.
